# Supplementary material
Source: Springer Nature journal article supplement (https://www.springermedizin.de/resource/supplementary/12985_2007_357_MOESM2_ESM.pdf/9608058)

0  $\mu\text{g/ml}$

1  $\mu\text{g/ml}$

6  $\mu\text{g/ml}$

12  $\mu\text{g/ml}$

**A) X4 infection**

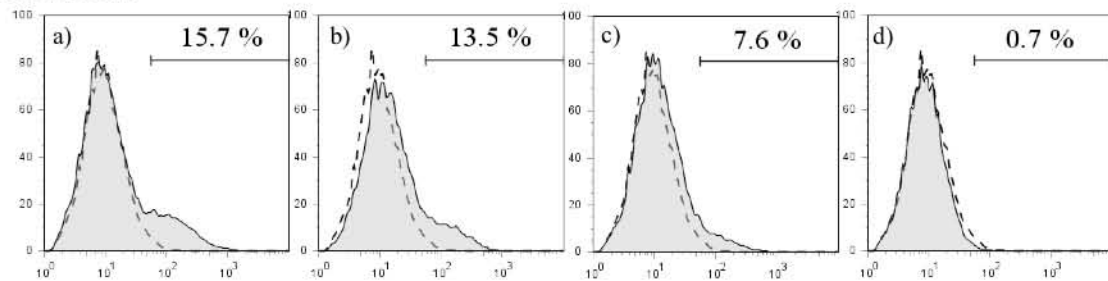

**B) R5 infection**

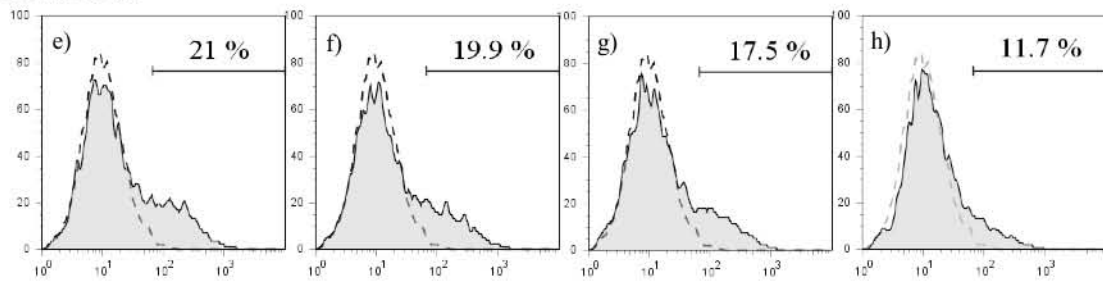

GFP Expression

Supplement: MOESM2 [file 9608058]
